# Supplementary material for: Origin and fate of the secondary nitrite maximum in the Arabian Sea
Source: Copernicus journal article supplement (doi:10.5194/bg-8-1565-2011), 2011-06-20
Supplement: Supplementary file 1 [file bg-8-1565-2011-supplement.zip]

**Table B1.** Ammonia oxidation rates measured via  $^{15}\text{NH}_4^+$ -incubation experiments at various controlled oxygen levels in the central-NE Arabian Sea OMZ. Rates are determined as the slope ( $\pm$  standard error) in a linear regression between  $^{15}\text{NO}_2^-$  production and incubation time.

| Sample                                           | Oxygen<br>( $\mu\text{M}$ ) | Ammonia oxidation rates<br>( $\text{nM N d}^{-1}$ ) |
|--------------------------------------------------|-----------------------------|-----------------------------------------------------|
| <b>St. 949 (150 m)</b>                           | 2                           | 0                                                   |
| <i>in situ</i> $\text{NH}_4^+ = 30.7 \text{ nM}$ | 5                           | 0                                                   |
| <i>in situ</i> $\text{O}_2 = 4.6 \mu\text{M}$    | 8                           | $1.2 \pm 0.2$                                       |
|                                                  | 12                          | $3.6 \pm 0.04$                                      |
| <b>St. 953 (125 m)</b>                           | 0                           | 0                                                   |
| <i>in situ</i> $\text{NH}_4^+ = 3.9 \text{ nM}$  | 2.5                         | 0                                                   |
| <i>in situ</i> $\text{O}_2 = 3.9 \mu\text{M}$    | 5                           | 0                                                   |
|                                                  | 10                          | $3.5 \pm 0.3$                                       |

**Table B2.** Primers used in the detection of various N-cycling functional genes and their expression in this study. Unless otherwise stated, the same PCR protocols are used for real-time PCR with the following modifications: (1) the initial denaturing step was 10 minutes at 95°C, (2) no final extension, (3) 50 cycles were performed followed by melting analyses <sup>1</sup>. Primers designed in this study are marked by asterisks. For real-time PCR, the SYBR Green chemistry was used in most cases, except when a probe was listed alongside the primers, in which case the TaqMan chemistry was applied. ‘F’ indicates false positive PCR products of targeted size identified after cloning and sequencing.

| Functional Group                           | Target Gene | Primers   | Sequence (5'-3')           | PCR conditions                                                                                                                                                                               | Ref. | (RT)-PCR/<br>sequencing | Real-time<br>PCR |
|--------------------------------------------|-------------|-----------|----------------------------|----------------------------------------------------------------------------------------------------------------------------------------------------------------------------------------------|------|-------------------------|------------------|
| Anammox<br>(Scalindua)                     | <i>nirS</i> | Scnir372F | TGT AGC CAG CAT TGT AGC GT | 95 °C for 2 min, 30x (95°C for 45s, 60°C for 1 min, 72°C for 1 min), 72°C for 15 min                                                                                                         | 2    | +                       | +                |
|                                            | <i>nirS</i> | Scnir845R | TCA AGC CAG ACC CAT TTG CT |                                                                                                                                                                                              | 2    | +                       | +                |
| Denitrifier                                | <i>nirS</i> | cd3aF     | GTS AAC GTS AAG GAR ACS GG | 94 °C for 2 min, 35 x (94°C for 30s, 51°C for 1 min, 72°C for 1 min), 72 °C for 10 min                                                                                                       | 3    | +                       | +                |
|                                            | <i>nirS</i> | R3cd      | GAS TTC GGR TGS GTC TTG A  |                                                                                                                                                                                              | 4    | +                       | +                |
| Denitrifier                                | <i>nirS</i> | nirS1F    | CCT AYT GGC CGC CRC ART    | <u>Touchdown PCR</u> : 95°C for 5 min, 10 x [95°C for 30 s, 55°C (-0.5°C per cycle) for 30 s, 72°C for 1 min], 25x [95°C for 30 s, 49°C for 30 s, 72°C for 1 min]; 72°C for 7 min            | 5    | +                       |                  |
|                                            | <i>nirS</i> | nirS6R    | CGT TGA ACT TRC CGG T      |                                                                                                                                                                                              | 5    | +                       |                  |
| Nitrate reducers                           | <i>narG</i> | narG1960f | TAY GTS GGS CAR GAR AA     | <u>Touchdown PCR</u> : 95°C for 5 min, 10 x [94°C for 30 s, 60°C (-0.5°C per cycle) for 30 s, 72°C for 6 min], 30x [95°C for 30 s, 49°C for 30 s, 72°C for 1 min]; 72°C for 7 min            | 6    | +                       |                  |
|                                            | <i>narG</i> | narG2650r | TYT CRT ACC ABG TBG C      |                                                                                                                                                                                              | 6    | +                       |                  |
|                                            |             |           |                            | <u>Real-time PCR</u> : 95 °C for 10 min, 40x (95°C for 45s, 51°C for 1 min, 72°C for 3 min), 72°C for 15 min                                                                                 | 2    |                         | +                |
| DNRA                                       | <i>nrfA</i> | nrfA F1   | GCN TGY TGG WSN TGY AA     | <u>Touchdown PCR</u> : 94 °C for 5 min; 30 x [94 °C for 1 min, 60 °C (-0.5°C per cycle) for 1 min, 72 °C for 90 s] 30 x [94 °C for 30 s; 45 °C for 30 s, 72 °C for 1 min]; 72 °C for 10 min. | 7    | +                       |                  |
|                                            | <i>nrfA</i> | nrfA R1   | TWN GGC ATR TGR CAR TC     |                                                                                                                                                                                              | 7    | +                       |                  |
| DNRA                                       | <i>nrfA</i> | nrfA6F    | GAY TGC CAY ATG CCR AAA GT | <u>Real-time PCR</u> : 95°C for 10 min, 40 x [94°C for 20 s, 54.5°C for 30s, 72°C for 1 min]                                                                                                 | 8    |                         | +                |
|                                            | <i>nrfA</i> | nrfA6R    | GCB KCT TTY GCT TCR AAG TG |                                                                                                                                                                                              | 8    |                         | +                |
| β-proteobacterial<br>ammonia-<br>oxidizers | <i>amoA</i> | amoA1F'   | GGG GTT TCT ACT GGT GG     | 94°C for 3 min, 30 x (94°C for 20s, 55°C for 1 min, 72°C for 1 min), 72°C for 10 min                                                                                                         | 9    | +                       | +                |
|                                            | <i>amoA</i> | amoA2R    | CCT CKG SAA AGC CTT CTT C  |                                                                                                                                                                                              | 9    | +                       | +                |
| γ-proteobacterial<br>ammonia<br>oxidizers  | <i>amoA</i> | amoA3F    | GGT GAG TGG GYT AAC MG     | 94°C for 3 min, 30 x (94°C for 20s, 48°C for 1 min, 72°C for 1 min), 72°C for 10 min                                                                                                         | 10   | +                       | +                |
|                                            | <i>amoA</i> | amoB4R    | GCT AGC CAC TTT CTG G      |                                                                                                                                                                                              | 10   | +                       | +                |

|                                                                         |              |                 |                                         |                                                                                                                                                                                   |    |     |   |
|-------------------------------------------------------------------------|--------------|-----------------|-----------------------------------------|-----------------------------------------------------------------------------------------------------------------------------------------------------------------------------------|----|-----|---|
| Archaeal ammonia-oxidizers                                              | <i>amoA</i>  | Arch-amoAF      | STA ATG GTC TGG CTT AGA CG              | 95°C for 5 min, 30 x (94°C for 45s, 53°C for 1 min, 72°C for 1 min), 72°C for 15 min                                                                                              | 11 | +   | + |
|                                                                         | <i>amoA</i>  | Arch-amoAR      | GCG GCC ATC CAT CTG TAT GT              |                                                                                                                                                                                   | 11 | +   | + |
| Nitric oxide reducers<br>(cytochrome <i>bc</i> containing <i>norB</i> ) | <i>cnorB</i> | norB1F          | CGN GAR TTY CTS GAR CAR CC              | 94 °C for 4 min, 30 x [94 °C for 1 min, 50 °C for 1.5 min, 72 °C for 2 min], 72°C for 5 min                                                                                       | 12 |     |   |
|                                                                         | <i>cnorB</i> | norB3R          | CCY TCV ACC CAG ASA TGC AC              |                                                                                                                                                                                   | 12 | +/- |   |
|                                                                         | <i>cnorB</i> | norB8R          | CRT ADG CVC CRW AGA AVG C               | (with norB1F): 94 °C for 4 min, 30 x [94 °C for 1 min, 55 °C for 1 min, 72 °C for 1 min], 72°C for 7 min                                                                          | 12 | +/- |   |
|                                                                         | <i>cnorB</i> | cnorB1F         | GAR TTY CTN GAR CAR CC                  | <u>Touchdown PCR</u> : 95°C for 5 min, 10 x [95°C for 30 s, 57°C (-0.5°C per cycle) for 40 s, 72°C for 1 min], 30x [95°C for 30 s, 55°C for 40 s, 72°C for 1 min]; 72°C for 7 min | 13 | +/- |   |
|                                                                         | <i>cnorB</i> | cnorB2F         | GAC AAG NNN TAC TGG TGG T               |                                                                                                                                                                                   | 13 | +/- |   |
|                                                                         | <i>cnorB</i> | cnorB6R         | GAA NCC CCA NAC NCC NGC                 |                                                                                                                                                                                   | 13 |     |   |
| Arabian Sea cluster 2                                                   | <i>cnorB</i> | ASc2-1f         | GAR TTY CTN GAG CAG CC                  | <u>Real-time PCR</u> : 50°C for 2 min, 95 °C for 10 min, 50x [95°C for 15s, 54°C for 30s, 72°C for 1 min, 76°C for 10s (data recording)]                                          | *  |     | + |
|                                                                         | <i>cnorB</i> | ASc2-307r       | TTA CYT CRC GGT CAA CAC C               |                                                                                                                                                                                   | *  |     | + |
| Arabian Sea cluster 3                                                   | <i>cnorB</i> | ASc3-179f       | ACC TTG CGG TGG ACA AGA TGT ACT         | <u>Real-time PCR</u> : 50°C for 2 min, 95°C for 10 min, 50x [95°C for 15s, 58°C for 1 min]                                                                                        | *  |     | - |
|                                                                         | <i>cnorB</i> | ASc3-239 probe  | GGG AAC TGA TCA TGG CGT CGA TCC TGG CGT |                                                                                                                                                                                   | *  |     | - |
|                                                                         | <i>cnorB</i> | ASc3-378r       | ATA GTG ATG GCC GGT ACC CAG AAT         |                                                                                                                                                                                   | *  |     | - |
| Arabian Sea cluster 4                                                   | <i>cnorB</i> | ASc4-34f        | GGC GTA TGG GAA TTG ATC ATG GCT         | <u>Real-time PCR</u> : 50°C for 2 min, 95°C for 10 min, 50x [95°C for 15s, 60°C for 1 min]                                                                                        | *  |     | + |
|                                                                         | <i>cnorB</i> | ASc4-86 probe   | TGA CCG GTG TGG ATC GCG AAG TGA TCG AAA |                                                                                                                                                                                   | *  |     | + |
|                                                                         | <i>cnorB</i> | ASc4-153r       | GGA GAA CAG TGC CAA CCC AAC AAT         |                                                                                                                                                                                   | *  |     | + |
| Nitric oxide reducers (quinol-containing <i>norB</i> )                  | <i>qnorB</i> | qnorB2F         | GGN CAY CAR GGN TAY GA                  | <u>Touchdown PCR</u> : 95°C for 5 min, 10 x [95°C for 30 s, 57°C (-0.5°C per cycle) for 40 s, 72°C for 1 min], 30x [95°C for 30 s, 55°C for 40 s, 72°C for 1 min]; 72°C for 7 min | 13 |     |   |
|                                                                         | <i>qnorB</i> | qnorB7R         | GGN GGR TTD ATC ADG AAN CC              |                                                                                                                                                                                   | 13 | +/- |   |
|                                                                         | <i>qnorB</i> | qnorB5R         | ACC CAN AGR TGN ACN ACC CAC CA          |                                                                                                                                                                                   | 13 | -   |   |
| Arabian Sea cluster                                                     | <i>qnorB</i> | ASqnor270f      | ATT CTT CGA GGT CTT TGC CAC G           | <u>Real-time PCR</u> : 50°C for 2 min, 95°C for 10 min, 50x [95°C for 15s, 60°C for 2 min]                                                                                        | *  |     | + |
|                                                                         | <i>qnorB</i> | ASqnor458 probe | TGT TCA GTG CTC TGG AAG TGG TGC CGC T   |                                                                                                                                                                                   | *  |     | + |
|                                                                         | <i>qnorB</i> | ASqnor566r      | ATC GGC CAT TTG TAA CGC TGG A           |                                                                                                                                                                                   | *  |     | + |
| Denitrifiers (nitrous oxide reducers)                                   | <i>nosZ</i>  | nosZ-F          | CGY TGT TCM TCG ACA GCC AG              | 94 °C for 2 min, 35 x (94°C for 30s, 50°C for 1 min, 72°C for 1 min), 72 °C for 10 min                                                                                            | 14 |     |   |
|                                                                         | <i>nosZ</i>  | nosZ-R          | CAT GTG CAG NGC RTG GCA GAA             |                                                                                                                                                                                   | 14 | -   |   |
|                                                                         | <i>nosZ</i>  | Nos1773R        | AAC GAV CAG YTG ATC GAY AT              | (with nosZ-F): 94 °C for 2 min, 35 x (94°C for 30s, 55°C for 1 min, 72°C for 1 min), 72 °C for 10 min                                                                             | 15 | -   |   |

|                 |                 |               |                               |                                                                                                                            |    |   |
|-----------------|-----------------|---------------|-------------------------------|----------------------------------------------------------------------------------------------------------------------------|----|---|
|                 | <i>nosZ</i>     | nosZ1622R     | CGC RAS GGC AAS AAG GTS CG    | (with nosZ-F): 94 °C for 2 min, 35 x (94°C for 30s, 53°C for 1 min, 72°C for 1 min), 72 °C for 10 min                      | 4  | F |
| Nitrogen fixers | <i>nifH</i>     | nifH3         | ATR TTR TTN GCN GCR TA        | 95°C for 5 min, 30 x [95°C for 1 min, 55°C for 1 min, 72°C for 1 min], 72°C for 5 min                                      | 16 | - |
|                 | <i>nifH</i>     | nifH4         | TTY TAY GGN AAR GGN GG        |                                                                                                                            | 16 | - |
|                 | <i>nifH</i>     | nifH1         | TGY GAY CCN AAR GCN GA        | <u>Nested PCR from nifH3-nifH4</u> : 95°C for 5 min, 30 x [95°C for 1 min, 55°C for 1 min, 72°C for 1 min], 72°C for 5 min | 16 | F |
|                 | <i>nifH</i>     | nifH2         | AND GCC ATC ATY TCN CC        |                                                                                                                            | 16 | F |
| Crenarchaea     | <i>16S rRNA</i> | Cren334F      | AGA TGG GTA CTG AGA CAC GGA C |                                                                                                                            | 1  | + |
|                 | <i>16S rRNA</i> | Cren554R      | CTG TAG GCC CAA TAA TCA TCC T | <u>Real-time PCR:</u>                                                                                                      | 1  | + |
|                 | <i>16S rRNA</i> | Cren519 probe | TTA CCG CGG CGG CTG ACA C     | 50°C for 2 min, 95°C for 10 min, 40x [95°C for 15s, 60°C for 1 min]                                                        | 1  | + |

## References

1. Lam, P. et al. Linking crenarchaeal and bacterial nitrification to anammox in the Black Sea. *Proc. Natl. Acad. Sci. USA* **104**, 7104-7109 (2007).
2. Lam, P. et al. Revising the nitrogen cycle in the Peruvian oxygen minimum zone. *Proc. Natl. Acad. Sci. USA* **106**, 4752-4757 (2009).
3. Michotey, V., Mejean, V. & Bonin, P. Comparison of Methods for Quantification of Cytochrome cd1-Denitrifying Bacteria in Environmental Marine Samples. *Appl. Environ. Microbiol.* **66**, 1564-1571 (2000).
4. Throback, I.N., Enwall, K., Jarvis, A. & Hallin, S. Reassessing PCR primers targeting nirS, nirK and nosZ genes for community surveys of denitrifying bacteria with DGGE. *FEMS Microbiol. Ecol.* **49**, 401-417 (2004).
5. Braker, G., Fesefeldt, A. & Witzel, K.-P. Development of PCR Primer Systems for Amplification of Nitrite Reductase Genes (nirK and nirS) To Detect Denitrifying Bacteria in Environmental Samples. *Appl. Environ. Microbiol.* **64**, 3769-3775 (1998).
6. Philippot, L., Piutti, S., Martin-Laurent, F., Hallet, S. & Germon, J.C. Molecular Analysis of the Nitrate-Reducing Community from Unplanted and Maize-Planted Soils. *Appl. Environ. Microbiol.* **68**, 6121-6128 (2002).
7. Mohan, S.B., Schmid, M., Jetten, M. & Cole, J. Detection and widespread distribution of the nrfA gene encoding nitrite reduction to ammonia, a short circuit in the biological nitrogen cycle that competes with denitrification. *FEMS Microbiol. Ecol.* **49**, 433-443 (2004).
8. Takeuchi, J. Habitat Segregation of a Functional Gene Encoding Nitrate Ammonification in Estuarine Sediments. *Geomicrobiol. Journal* **23**, 75-87 (2006).
9. Rotthauwe, J.-H., Witzel, K.-P. & Liesack, W. The ammonia monooxygenase structural gene *amoA* as a functional marker: molecular fine-scale analysis of natural ammonia-oxidizing populations. *Appl. Environ. Microbiol.* **63**, 4704-4712 (1997).
10. Purkhold, U. et al. Phylogeny of all recognized species of ammonia oxidizers based on comparative 16S rRNA and *amoA* sequence analysis: implications for molecular diversity surveys. *Appl. Environ. Microbiol.* **66**, 5368-5382 (2000).
11. Francis, C.A., Roberts, K.J., Beman, J.M., Santoro, A.E. & Oakley, B.B. Ubiquity and diversity of ammonia-oxidizing archaea in water columns and sediments of the ocean. *Proc. Natl. Acad. Sci. USA* **102**, 14683-14688 (2005).
12. Casciotti, K.L. & Ward, B.B. Phylogenetic analysis of nitric oxide reductase gene homologues from aerobic ammonia-oxidizing bacteria. *FEMS Microbiol. Ecol.* **52**, 197-205 (2005).

13. Braker, G. & Tiedje, J.M. Nitric Oxide Reductase (norB) Genes from Pure Cultures and Environmental Samples. *Appl. Environ. Microbiol.* **69**, 3476-3483 (2003).
14. Kloos, K., Mergel, A., sch, C. & Bothe, H. Denitrification within the genus *Azospirillum* and other associative bacteria. *Functional Plant Biology* **28**, 991-998 (2001).
15. Scala, D.J. & Kerkhof, L.J. Nitrous oxide reductase (nosZ) gene-specific PCR primers for detection of denitrifiers and three nosZ genes from marine sediments. *FEMS Microbiol. Lett.* **162**, 61-68 (1998).
16. Zani, S., Mellon, M.T., Collier, J.L. & Zehr, J.P. Expression of nifH Genes in Natural Microbial Assemblages in Lake George, New York, Detected by Reverse Transcriptase PCR. *Appl. Environ. Microbiol.* **66**, 3119-3124 (2000).

**Table B3.** The measured variables and the respective abbreviations used in the non-metric multidimensional scaling analysis based on Spearman rank correlation in this study. Five final dimensions were chosen with a final stress of 0.0633. Analyses were conducted with the Statistics Toolbox of Matlab (R2008b, The Mathworks, Inc.).

| <i>Abbreviations</i> | <i>Measured Variables</i>                                                                                                                  |
|----------------------|--------------------------------------------------------------------------------------------------------------------------------------------|
| ndens                | Neutral density                                                                                                                            |
| O2                   | Dissolved oxygen                                                                                                                           |
| NH4                  | Ammonium concentration                                                                                                                     |
| NO2                  | Nitrite concentration                                                                                                                      |
| NO3                  | Nitrate concentration                                                                                                                      |
| N*                   | Nitrogen deficit expressed as $N^* = [\text{Total measured inorganic N}] - 16[\text{PO}_4^{3-}] + 2.9 \times \text{density}$               |
| PO4                  | Phosphate concentration                                                                                                                    |
| N2O                  | Nitrous oxide concentration                                                                                                                |
| PN                   | Surface particulate nitrogen                                                                                                               |
| POC                  | Surface particulate organic carbon                                                                                                         |
| CN                   | Particulate carbon to nitrogen ratios                                                                                                      |
| AO                   | Ammonia oxidation rates                                                                                                                    |
| NR                   | Nitrate reduction rates                                                                                                                    |
| AmxNH4               | Anammox rates measured via $^{15}\text{NH}_4^+$ incubations                                                                                |
| AmxNO2               | Anammox rates measured via $^{15}\text{NO}_2^-$ incubations                                                                                |
| pAmxNO2              | Potential anammox rates measured via $^{15}\text{NO}_2^- + ^{14}\text{NH}_4^+$ incubations                                                 |
| pAmxNH4              | Potential anammox rates measured via $^{15}\text{NH}_4^+ + ^{14}\text{NO}_2^-$ incubations                                                 |
| DNRA                 | Dissimilatory nitrate/nitrite reduction rates                                                                                              |
| BS820                | Anammox bacterial cell abundance enumerated via CARD-FISH with anammox-specific probe BS820c                                               |
| RNA                  | Total RNA concentration                                                                                                                    |
| DNA                  | Total DNA concentration                                                                                                                    |
| RNA:DNA              | Total RNA:DNA ratios                                                                                                                       |
| FCM                  | Total microbial abundance measured via flow cytometry                                                                                      |
| Cren16S              | Crenarchaeal abundance measured by 16S rDNA targeted real-time PCR                                                                         |
| AamoAm               | Archaeal ammonia monooxygenase subunit A ( <i>amoA</i> ) gene expression levels as mRNA                                                    |
| AamoAd               | Archaeal <i>amoA</i> gene abundance                                                                                                        |
| RAmoA                | Gene expression ratios (mRNA: DNA) of archaeal <i>amoA</i> genes                                                                           |
| AamoA:16S            | Ratios of archaeal <i>amoA</i> gene copies to crenarchaeal 16S rRNA gene copies                                                            |
| bamoAm               | $\beta$ -Proteobacterial <i>amoA</i> gene expression levels as mRNA                                                                        |
| bamoAd               | $\beta$ -Proteobacterial <i>amoA</i> gene abundance                                                                                        |
| RbamoA               | Gene expression ratios (mRNA: DNA) of $\beta$ -proteobacterial <i>amoA</i> genes                                                           |
| gamoAm               | $\gamma$ -Proteobacterial <i>amoA</i> gene expression levels as mRNA                                                                       |
| gamoAd               | $\gamma$ -Proteobacterial <i>amoA</i> gene abundance                                                                                       |
| RgamoA               | Gene expression ratios (mRNA: DNA) of $\gamma$ -proteobacterial <i>amoA</i> genes                                                          |
| Scnirm               | Anammox (Scalindua)-specific <i>cd1</i> -nitrite reductase gene ( <i>nirS</i> ) expression levels as mRNA                                  |
| Scnird               | Anammox (Scalindua)- specific <i>nirS</i> gene abundance                                                                                   |
| RScnir               | Gene expression ratios (mRNA: DNA) of Scalindua-specific <i>nirS</i> genes                                                                 |
| nirSm                | Denitrifier <i>nirS</i> gene expression levels as mRNA                                                                                     |
| nirSd                | Denitrifier <i>nirS</i> gene abundance                                                                                                     |
| RnirS                | Gene expression ratios (mRNA: DNA) of denitrifier <i>nirS</i> genes                                                                        |
| narGm                | Membrane-bound nitrate reductase gene large subunit ( <i>narG</i> ) expression levels as mRNA                                              |
| narGd                | <i>narG</i> gene abundance                                                                                                                 |
| RnarG                | Gene expression ratios (mRNA: DNA) of <i>narG</i>                                                                                          |
| nrfAm                | Cytochrome <i>c</i> nitrite reductase subunit A ( <i>nrfA</i> ) gene expression levels as mRNA                                             |
| nrfAd                | <i>nrfA</i> gene abundance                                                                                                                 |
| RnrfA                | Gene expression ratios (mRNA: DNA) of <i>nrfA</i> genes                                                                                    |
| cnorBc2m             | Expression levels of Arabian Sea cluster 2 cytochrome <i>bc</i> containing nitric oxide reductase subunit B ( <i>cnorB</i> ) genes as mRNA |
| cnorBc4m             | Arabian Sea cluster 4 <i>cnorB</i> gene expression as mRNA                                                                                 |
| TnorBm               | Total Arabian Sea type quinol- and cytochrome- <i>bc</i> - containing <i>norB</i> gene expressions as mRNA                                 |
